# Supplementary material for: A Systematic Review of Epidemiology and Outcomes Associated with Local Surgical and Intersphincteric Ligation Procedures for Complex Cryptoglandular Fistulas
Source: PubMed Central journal article supplement — Adv Ther. 2023 Mar 11;40(5):1926–56. doi: 10.1007/s12325-023-02452-x (PMC10129974; doi:10.1007/s12325-023-02452-x), 2023-03-11
Supplement: 12325_2023_2452_MOESM1_ESM.pdf [file 12325_2023_2452_MOESM1_ESM.pdf]

# **A Systematic Review of Epidemiology and Outcomes Associated with Local Surgical and Intersphincteric Ligation Procedures for Complex Cryptoglandular Fistulas**

Kristy Iglay<sup>1</sup>, Dimitri Bennett, MD<sup>2,3</sup>, Michael D Kappelman, MD<sup>4</sup>, Xinruo Zhang<sup>1,5</sup>, Molly Aldridge<sup>1</sup>, Chitra Karki, MPH<sup>2</sup>, Suzanne F Cook<sup>1,2</sup>

<sup>1</sup>CERobs Consulting, LLC, Wrightsville Beach, NC, 28480, USA

<sup>2</sup>Takeda Pharmaceuticals, Cambridge, MA, 02139 USA

<sup>3</sup>Perelman School of Medicine, University of Pennsylvania, Philadelphia, PA, 19104, USA

<sup>4</sup>Pediatric Gastroenterology, University of North Carolina, Chapel Hill School of Medicine, Chapel Hill, NC, 27599, USA

<sup>5</sup>Department of Epidemiology, Gillings School of Global Public Health, University of North Carolina at Chapel Hill, Chapel Hill, NC, 27599, USA

## **Corresponding author details**

Kristy Iglay, PhD, CERobs Consulting, LLC, 2612 North Lumina Ave., Wrightsville Beach, NC 28480 Email:

[kristy.iglay@laylen.com](mailto:kristy.iglay@laylen.com).

**Supplementary Table S1. Inclusion Criteria for Systematic Review**

|                 | Inclusion criteria                                                                                                                                                                                                                                                                                                                                                                                                                                                                                                                                                                                                                                                                                                                                                                                                                                                                                                                                                                                                                                                                                                                                                    |
|-----------------|-----------------------------------------------------------------------------------------------------------------------------------------------------------------------------------------------------------------------------------------------------------------------------------------------------------------------------------------------------------------------------------------------------------------------------------------------------------------------------------------------------------------------------------------------------------------------------------------------------------------------------------------------------------------------------------------------------------------------------------------------------------------------------------------------------------------------------------------------------------------------------------------------------------------------------------------------------------------------------------------------------------------------------------------------------------------------------------------------------------------------------------------------------------------------|
| Population(s)   | <ul style="list-style-type: none"> <li>• Human patients with cryptoglandular or Crohn’s-related rectovaginal, anovaginal or enterocutaneous fistulas</li> </ul> <p><i>Note: The current report is limited to those studies assessing complex cryptoglandular fistula</i></p> <ul style="list-style-type: none"> <li>• No restrictions regarding other demographic characteristics</li> </ul>                                                                                                                                                                                                                                                                                                                                                                                                                                                                                                                                                                                                                                                                                                                                                                          |
| Intervention(s) | <ul style="list-style-type: none"> <li>• No restrictions for assessment of incidence/prevalence or HCRU/costs</li> <li>• Treatment patterns, ClinROs and PROs will focus on the following interventions:               <ul style="list-style-type: none"> <li>- Pharmacologic: antibiotics, immunosuppressants, corticosteroids, prednisone, methotrexate, anti-tumor necrosis factor (infliximab, adalimumab, certolizumab pegol), monoclonal antibody (natalizumab, vedolizumab), interleukin antagonist (ustekinumab)</li> <li>- Surgical: fistulotomy, ligation of the intersphincteric fistula tract, cutting seton, fibrosing seton, drainage seton, sphincteric reconstruction, flap, ablation, fibrin glue, anal fistula plug, bioprosthesis plug, surgical reconstruction, sphincterotomy, sphincteroplasty, proctectomy, diversion, ostomy</li> </ul> </li> </ul> <p><i>Note: The current report is limited to the following surgical treatments: fistulotomy, fistulectomy, Modified Park’s Technique, Advancement flap, ligation of the intersphincteric fistula tract (LIFT), BioLift, and transanal opening of intersphincteric space (TROPIS).</i></p> |
| Comparison(s)   | <ul style="list-style-type: none"> <li>• No restrictions on comparators for assessment of incidence/prevalence or HCRU/costs</li> <li>• Assessment of treatment patterns in studies that include the pharmacologic or surgical interventions listed above</li> </ul>                                                                                                                                                                                                                                                                                                                                                                                                                                                                                                                                                                                                                                                                                                                                                                                                                                                                                                  |

|                |                                                                                                                                                                                                                                                                                                                                                                                                                                                                                                                                                                                                                                                                                                                                                                                                                                                                           |
|----------------|---------------------------------------------------------------------------------------------------------------------------------------------------------------------------------------------------------------------------------------------------------------------------------------------------------------------------------------------------------------------------------------------------------------------------------------------------------------------------------------------------------------------------------------------------------------------------------------------------------------------------------------------------------------------------------------------------------------------------------------------------------------------------------------------------------------------------------------------------------------------------|
|                | <ul style="list-style-type: none"> <li>• Clinical and patient-reported outcomes in single arm or comparator studies assessing the interventions listed above</li> </ul>                                                                                                                                                                                                                                                                                                                                                                                                                                                                                                                                                                                                                                                                                                   |
| Outcome(s)     | <ul style="list-style-type: none"> <li>• Incidence and prevalence</li> <li>• HCRU: Outpatient physician visits, Inpatient/hospital admissions, Emergency room visits, Laboratory tests, Diagnostic and therapeutic tests, length of stay</li> <li>• Direct and indirect costs</li> <li>• Treatment patterns: Proportion of patients utilizing pre-specified surgery or pharmacologic treatment</li> <li>• Clinical outcomes: healing rate, success rate, response rate, recurrence rate, fistula closure, clinical response, clinical remission</li> <li>• Specific PRO instruments of interest: Crohn's Disease Activity Index (CDAI), Inflammatory bowel disease questionnaire (IBDQ), EQ-5D</li> <li>• Other PRO Categories: pain</li> </ul> <p><i>Note: The current report is limited to the following outcomes: healing, recurrence, incontinence, and pain.</i></p> |
| Time           | <ul style="list-style-type: none"> <li>• No restriction on duration of illness or treatment</li> <li>• Publications within the past 10 years</li> </ul> <p><i>Note: The current report is limited to publications within the past 5 years.</i></p>                                                                                                                                                                                                                                                                                                                                                                                                                                                                                                                                                                                                                        |
| Study design   | <ul style="list-style-type: none"> <li>• Observational studies: case-control studies, retrospective or prospective cohort studies/registries, cross-sectional studies</li> <li>• Pooled data excluded; however, studies identified in those reports would be reviewed as part of the manual search for inclusion. Other publications that are not original research, clinical trials, case reports/series* are excluded</li> </ul>                                                                                                                                                                                                                                                                                                                                                                                                                                        |
| Other-language | <ul style="list-style-type: none"> <li>• English language</li> </ul>                                                                                                                                                                                                                                                                                                                                                                                                                                                                                                                                                                                                                                                                                                                                                                                                      |

\*Case series are included if they meet pre-specified criteria for cohort design.

## Supplemental Table S2. PubMed Search Strategy

PubMed search strategy (conducted on 3/25/2020)

| Row               | Search concept                                                                                                 | Terms                                                                                                                                                                                                                                                                                                                                                                                                                                                                                             |
|-------------------|----------------------------------------------------------------------------------------------------------------|---------------------------------------------------------------------------------------------------------------------------------------------------------------------------------------------------------------------------------------------------------------------------------------------------------------------------------------------------------------------------------------------------------------------------------------------------------------------------------------------------|
| <b>Conditions</b> |                                                                                                                |                                                                                                                                                                                                                                                                                                                                                                                                                                                                                                   |
| #1                | <b>Condition 1:</b><br>Complex<br>cryptoglandular<br>fistulas (CCF) and/or<br>cryptoglandular<br>fistulas (CF) | ((cryptoglandular[Title/Abstract] OR<br>cryptogland*[Title/Abstract] OR<br>horseshoe[Title/Abstract] OR<br>branching[Title/Abstract]) AND<br>("Fistula"[Mesh] OR "fistula"[Title/Abstract] OR<br>fistul*[Title/Abstract])) OR<br><br>((mid[Title/Abstract] OR high[Title/Abstract]) AND<br>(transphincteric[Title/Abstract] OR trans-<br>sphincteric[Title/Abstract] OR<br>transsphincteric[Title/Abstract]) AND<br>("Fistula"[Mesh] OR "fistula"[Title/Abstract] OR<br>fistul*[Title/Abstract])) |
| #2                | <b>Condition 2a:</b><br>Rectovaginal fistula                                                                   | "Rectovaginal Fistula"[Mesh] OR<br><br>(("rectovaginal"[Title/Abstract] OR "recto-<br>vaginal"[Title/Abstract]) AND<br>("Fistula"[Mesh] OR "fistula"[Title/Abstract] OR<br>fistul*[Title/Abstract]))                                                                                                                                                                                                                                                                                              |
|                   | <b>Condition 2b:</b><br>Anovaginal fistula                                                                     | (("anovaginal"[Title/Abstract] OR "ano-<br>vaginal"[Title/Abstract]) AND<br>("Fistula"[Mesh] OR "fistula"[Title/Abstract] OR<br>fistul*[Title/Abstract]))                                                                                                                                                                                                                                                                                                                                         |
|                   | <b>Condition 2c:</b><br>Enterocutaneous<br>fistula                                                             | (("enterocutaneous"[Title/Abstract] OR "entero-<br>cutaneous"[Title/Abstract]) AND<br>("Fistula"[Mesh] OR "fistula"[Title/Abstract] OR<br>fistul*[Title/Abstract]))                                                                                                                                                                                                                                                                                                                               |

|                              |                                                   |                                                                                                                                                                                                                                                                                                                                                                                                                                                                                                                                                                               |
|------------------------------|---------------------------------------------------|-------------------------------------------------------------------------------------------------------------------------------------------------------------------------------------------------------------------------------------------------------------------------------------------------------------------------------------------------------------------------------------------------------------------------------------------------------------------------------------------------------------------------------------------------------------------------------|
|                              | <b>Condition 2<br/>combined</b><br>2a OR 2b OR 2c | (((“Rectovaginal Fistula”[Mesh] OR<br>(“rectovaginal”[Title/Abstract] OR “recto-<br>vaginal”[Title/Abstract]) AND (“Fistula”[Mesh] OR<br>“fistula”[Title/Abstract] OR<br>fistul*[Title/Abstract]))) OR<br>(((“anovaginal”[Title/Abstract] OR “ano-<br>vaginal”[Title/Abstract]) AND (“Fistula”[Mesh] OR<br>“fistula”[Title/Abstract] OR<br>fistul*[Title/Abstract]))) OR<br>(((“enterocutaneous”[Title/Abstract] OR “entero-<br>cutaneous”[Title/Abstract]) AND (“Fistula”[Mesh]<br>OR “fistula”[Title/Abstract] OR<br>fistul*[Title/Abstract])))                             |
| #3                           | Crohns terms                                      | “Crohn Disease”[Mesh] OR crohn*[Title/Abstract]                                                                                                                                                                                                                                                                                                                                                                                                                                                                                                                               |
| #4                           | Fistula<br>(for title filter)                     | Fist*[Title]                                                                                                                                                                                                                                                                                                                                                                                                                                                                                                                                                                  |
| <b>Real World Data Terms</b> |                                                   |                                                                                                                                                                                                                                                                                                                                                                                                                                                                                                                                                                               |
| #5                           | Observational studies<br>and real world data      | (“Cohort Studies”[Mesh] OR “Cross-Sectional<br>Studies”[Mesh] OR “Longitudinal Studies”[Mesh]<br>OR “Prospective Studies”[Mesh] OR “case-control<br>study”[Mesh] OR “Registries”[Mesh] OR<br>“Electronic Health Records”[Mesh] OR<br>“Administrative Claims, Healthcare”[Mesh] OR<br>“Observational Study” [Publication Type] OR<br><br>cohort[Title/Abstract] OR cohort*[Title/Abstract]<br>OR cross-sectional[Title/Abstract] OR cross-<br>section*[Title/Abstract] OR<br>longitudinal[Title/Abstract] OR<br>longitud*[Title/Abstract] OR<br>prospective[Title/Abstract] OR |

|  |  |                                                                                                                                                                                                                                                                                                                                                                                                                                                                                                                                                                                                                                          |
|--|--|------------------------------------------------------------------------------------------------------------------------------------------------------------------------------------------------------------------------------------------------------------------------------------------------------------------------------------------------------------------------------------------------------------------------------------------------------------------------------------------------------------------------------------------------------------------------------------------------------------------------------------------|
|  |  | <p>prospect*[Title/Abstract] OR<br/> retrospective[Title/Abstract] OR<br/> observational[Title/Abstract] OR<br/> observation*[Title/Abstract] OR<br/> registry[Title/Abstract] OR “electronic medical<br/> record”[Title/Abstract] OR “medical<br/> record”[Title/Abstract] OR “electronic health<br/> record”[Title/Abstract] OR “health<br/> record”[Title/Abstract] OR (claims[Title/Abstract]<br/> OR “claims data”[Title/Abstract] OR “administrative<br/> claims”[Title/Abstract] OR “systematic<br/> review”[Title/Abstract] OR “systematic literature<br/> review”[Title/Abstract] OR “meta-<br/> analysis”[Title/Abstract])</p> |
|--|--|------------------------------------------------------------------------------------------------------------------------------------------------------------------------------------------------------------------------------------------------------------------------------------------------------------------------------------------------------------------------------------------------------------------------------------------------------------------------------------------------------------------------------------------------------------------------------------------------------------------------------------------|

**Queries of Interest**

|    |                                            |                                                                                                                                                                                                                                                                                                                                                                                                                                                          |
|----|--------------------------------------------|----------------------------------------------------------------------------------------------------------------------------------------------------------------------------------------------------------------------------------------------------------------------------------------------------------------------------------------------------------------------------------------------------------------------------------------------------------|
| #6 | Measures of occurrence/association         | <p>“Epidemiology”[Mesh] OR<br/> “Pharmacoepidemiology”[Mesh] OR<br/> <br/> epidemiolog*[Title/Abstract] OR<br/> pharmacoepidemiolog*[Title/Abstract] OR<br/> prevalence[Title/Abstract] OR<br/> incidence[Title/Abstract] OR risk[Title/Abstract] OR<br/> rate[Title/Abstract] OR rates[Title/Abstract] OR<br/> proportion[Title/Abstract] OR<br/> proportions[Title/Abstract] OR<br/> frequency[Title/Abstract] OR<br/> frequencies[Title/Abstract]</p> |
| #7 | Health care resource utilization and costs | <p>“Costs and Cost Analysis”[Mesh] OR<br/> “Economics”[Mesh] OR “Health<br/> Expenditures”[Mesh] OR “Cost of Illness”[Mesh]<br/> OR “Cost-Benefit Analysis”[Mesh] OR “Health Care</p>                                                                                                                                                                                                                                                                    |

|    |                    |                                                                                                                                                                                                                                                                                                                                                                                                                                                                                                                                                                                                                                                                                                            |
|----|--------------------|------------------------------------------------------------------------------------------------------------------------------------------------------------------------------------------------------------------------------------------------------------------------------------------------------------------------------------------------------------------------------------------------------------------------------------------------------------------------------------------------------------------------------------------------------------------------------------------------------------------------------------------------------------------------------------------------------------|
|    |                    | <p>Costs"[Mesh] OR "Direct Service Costs"[Mesh] OR "Hospital Costs"[Mesh] OR "Drug Costs"[Mesh] OR "Health Resources"[Mesh] OR "Resource Allocation"[Mesh] OR</p> <p>"cost"[Title/Abstract] OR "costs"[Title/Abstract] OR "cost analysis"[Title/Abstract] OR "resource use"[Title/Abstract] OR "resource utilization"[Title/Abstract] OR expenditure[Title/Abstract] OR expenditures[Title/Abstract] OR economic[Title/Abstract] OR economics[Title/Abstract]</p>                                                                                                                                                                                                                                          |
| #8 | Treatment Patterns | <p>"Immunosuppression"[Mesh] OR "Immunosuppressive Agents"[Mesh] OR "Immunosuppressive Agents" [Pharmacological Action] OR "Anti-Bacterial Agents"[Mesh] OR "Anti-Bacterial Agents" [Pharmacological Action] OR "Antibodies, Monoclonal"[Mesh] OR "Surgical Procedures, Operative"[Mesh] OR "surgery" [Subheading] OR "Ostomy"[Mesh] OR</p> <p>(immunosuppress*[Title/Abstract] OR antibiotic[Title/Abstract] OR antibiotics[Title/Abstract] OR corticosteroid*[Title/Abstract] OR prednisone[Title/Abstract] OR Methotrexate[Title/Abstract] OR anti-TNF[Title/Abstract] OR "anti-tumor necrosis factor"[Title/Abstract] OR infliximab[Title/Abstract] OR adalimumab[Title/Abstract] OR "certolizumab</p> |

|  |                                                                                                                                                                                                                                                                                                                                                                                                                                                                                                                                                                                                                                                                                                                                                                                                                                                                                                                                                                                                                                                                                                                                                                                                                                                                                                                                 |
|--|---------------------------------------------------------------------------------------------------------------------------------------------------------------------------------------------------------------------------------------------------------------------------------------------------------------------------------------------------------------------------------------------------------------------------------------------------------------------------------------------------------------------------------------------------------------------------------------------------------------------------------------------------------------------------------------------------------------------------------------------------------------------------------------------------------------------------------------------------------------------------------------------------------------------------------------------------------------------------------------------------------------------------------------------------------------------------------------------------------------------------------------------------------------------------------------------------------------------------------------------------------------------------------------------------------------------------------|
|  | <p>pegol"[Title/Abstract] OR<br/>certolizumab[Title/Abstract] OR "monoclonal antibody"[Title/Abstract] OR "monoclonal antibodies"[Title/Abstract] OR<br/>Natalizumab[Title/Abstract] OR<br/>vedolizumab[Title/Abstract] OR "interleukin antagonist"[Title/Abstract] OR "interleukin antagonists"[Title/Abstract] OR "interleukin inhibitor"[Title/Abstract] OR "interleukin inhibitors"[Title/Abstract] OR<br/>Ustekinumab[Title/Abstract] OR<br/>cyclosporine[Title/Abstract] OR<br/>tacrolimus[Title/Abstract] OR</p> <p>surgery[Title/Abstract] OR<br/>Fistulotomy[Title/Abstract] OR "ligation of the intersphincteric fistula tract"[Title/Abstract] OR<br/>LIFT[Title/Abstract] OR ligation*[Title/Abstract]<br/>OR seton[Title/Abstract] OR "cutting seton"[Title/Abstract] OR "fibrosing seton"[Title/Abstract] OR "drainage seton" OR<br/>"seton placement"[Title/Abstract] OR<br/>flap[Title/Abstract] OR "advancement flap"[Title/Abstract] OR "advancement flaps"[Title/Abstract] OR ablation[Title/Abstract]<br/>OR "fibrin glue"[Title/Abstract] OR "bioprosthetic plug"[Title/Abstract] OR "anal fistula plug"[Title/Abstract] OR plug[Title/Abstract] OR<br/>plugs[Title/Abstract] OR sealant [Title/Abstract] OR<br/>sealants[Title/Abstract] OR "surgical reconstruction"[Title/Abstract] OR "sphincteric</p> |
|--|---------------------------------------------------------------------------------------------------------------------------------------------------------------------------------------------------------------------------------------------------------------------------------------------------------------------------------------------------------------------------------------------------------------------------------------------------------------------------------------------------------------------------------------------------------------------------------------------------------------------------------------------------------------------------------------------------------------------------------------------------------------------------------------------------------------------------------------------------------------------------------------------------------------------------------------------------------------------------------------------------------------------------------------------------------------------------------------------------------------------------------------------------------------------------------------------------------------------------------------------------------------------------------------------------------------------------------|



|    |                   |                                                                                                                                                                                                                                                                                                                                                                                                                                                                                                                                                                                                                                                                                                                                                                                                                                                        |
|----|-------------------|--------------------------------------------------------------------------------------------------------------------------------------------------------------------------------------------------------------------------------------------------------------------------------------------------------------------------------------------------------------------------------------------------------------------------------------------------------------------------------------------------------------------------------------------------------------------------------------------------------------------------------------------------------------------------------------------------------------------------------------------------------------------------------------------------------------------------------------------------------|
|    |                   | reconstruction"[Title/Abstract] OR<br>sphincterotomy[Title/Abstract] OR<br>sphincteroplasty[Title/Abstract] OR<br>proctectomy[Title/Abstract] OR<br>diversion[Title/Abstract] OR therapy[Title/Abstract]<br>OR therapeutic*[Title/Abstract] OR<br>pattern*[Title/Abstract] OR "treatment pattern"<br>[Title/Abstract] OR "treatment patterns"<br>[Title/Abstract] OR "ostomy"[Title/Abstract] OR<br>ostomies[Title/Abstract]OR<br>enterostomy[Title/Abstract] OR<br>enterostomies[Title/Abstract] OR<br>Cecostomy[Title/Abstract] OR<br>Cecostomies[Title/Abstract] OR<br>colostomy[Title/Abstract] OR<br>colostomies[Title/Abstract] OR<br>duodenostomy[Title/Abstract] OR<br>duodenostomies[Title/Abstract] OR<br>ileostomy[Title/Abstract] OR<br>ileostomies[Title/Abstract] OR<br>jejunostomy[Title/Abstract] OR<br>jejunostomies[Title/Abstract]) |
| #9 | Clinical outcomes | "Treatment Outcome"[Mesh] OR<br>(("healing"[Title/Abstract] OR<br>"success"[Title/Abstract] OR<br>"response"[Title/Abstract] OR<br>"recurrence"[Title/Abstract] OR<br>"remission"[Title/Abstract] OR<br>"incontinence"[Title/Abstract]) AND                                                                                                                                                                                                                                                                                                                                                                                                                                                                                                                                                                                                            |

|     |                              |                                                                                                                                                                                                                                                                                                                                                                                                                                                                                                                                                                                                                                                                                                                                                                                                                                                                                               |
|-----|------------------------------|-----------------------------------------------------------------------------------------------------------------------------------------------------------------------------------------------------------------------------------------------------------------------------------------------------------------------------------------------------------------------------------------------------------------------------------------------------------------------------------------------------------------------------------------------------------------------------------------------------------------------------------------------------------------------------------------------------------------------------------------------------------------------------------------------------------------------------------------------------------------------------------------------|
|     |                              | <p>(“rate”[Title/Abstract] OR<br/> “frequency”[Title/Abstract] OR<br/> “proportion”[Title/Abstract])) OR<br/> closure[Title/Abstract] OR<br/> “recurrence”[Title/Abstract] OR “recurrence<br/> risk”[Title/Abstract] OR “remission”[Title/Abstract]<br/> OR “remission risk”[Title/Abstract] OR<br/> “incontinence”[Title/Abstract] OR “incontinence<br/> risk”[Title/Abstract] OR “clinical<br/> response”[Title/Abstract] OR “clinical<br/> remission”[Title/Abstract]</p>                                                                                                                                                                                                                                                                                                                                                                                                                  |
| #10 | Patient-reported<br>outcomes | <p>“Patient Reported Outcome Measures”[Mesh] OR<br/> “Fecal Incontinence”[Mesh] OR</p> <p>(“patient reported outcomes”[Title/Abstract] OR<br/> “clinical outcome”[Title/Abstract] OR “Crohn’s<br/> Disease Activity Index”[Title/Abstract] OR<br/> CDAI[Title/Abstract] OR “IBD<br/> questionnaire”[Title/Abstract] OR<br/> “IBDQ”[Title/Abstract] OR “inflammatory bowel<br/> disease questionnaire”[Title/Abstract] OR “Patient<br/> reported outcome measures”[Title/Abstract] OR<br/> PROMs[Title/Abstract] OR “perianal disease activity<br/> index”[Title/Abstract] OR “PDAI”[Title/Abstract]<br/> OR “CDAI”[Title/Abstract] OR “anal<br/> pain”[Title/Abstract] OR pain[Title/Abstract] OR<br/> “fecal incontinence”[Title/Abstract] OR “faecal<br/> incontinence”[Title/Abstract] OR “bowel<br/> incontinence”[Title/Abstract] OR “fecal<br/> soiling”[Title/Abstract] OR “faecal</p> |

|                             |                                                      |                                                                                                                                                                                                                                                                                                                                                                                                                                                                                                                                                           |
|-----------------------------|------------------------------------------------------|-----------------------------------------------------------------------------------------------------------------------------------------------------------------------------------------------------------------------------------------------------------------------------------------------------------------------------------------------------------------------------------------------------------------------------------------------------------------------------------------------------------------------------------------------------------|
|                             |                                                      | soiling"[Title/Abstract] OR "leakage"[Title/Abstract] OR "discharge"[Title/Abstract] OR "soiling"[Title/Abstract] OR "soil"[Title/Abstract] OR "soiled"[Title/Abstract] OR "pads"[Title/Abstract] OR "EQ-5D"[Title/Abstract] OR "EuroQol"[Title/Abstract] OR "EuroQol-5D"[Title/Abstract] OR "intercourse"[Title/Abstract] OR "sexual activity"[Title/Abstract] OR "Wexner Scale of incontinence"[Title/Abstract] OR "Revised Fecal Incontinence Scale"[Title/Abstract] OR "Revised Faecal Incontinence Scale"[Title/Abstract] OR "RFIS"[Title/Abstract]) |
| <b>Combination Searches</b> |                                                      |                                                                                                                                                                                                                                                                                                                                                                                                                                                                                                                                                           |
| #11                         | Condition 2 + Crohn's                                | (#2a OR 2b OR 2c) AND #3                                                                                                                                                                                                                                                                                                                                                                                                                                                                                                                                  |
| #12                         | Combined Queries                                     | #6 OR #7 OR #8 OR #9 OR #10                                                                                                                                                                                                                                                                                                                                                                                                                                                                                                                               |
| <b>SEARCH RESULTS</b>       |                                                      |                                                                                                                                                                                                                                                                                                                                                                                                                                                                                                                                                           |
| #13                         | Condition 2 +<br>Combined Queries +<br>RWD + filters | #11 AND #12 AND #5 +English, human, 10 years filters                                                                                                                                                                                                                                                                                                                                                                                                                                                                                                      |
| #14                         | Condition 1 +<br>Combined Queries +<br>RWD + filters | #1 AND #12 AND #5 +English, human, 10 years filters                                                                                                                                                                                                                                                                                                                                                                                                                                                                                                       |
| #15                         | Final search including<br>fistula title search       | (#13 OR #14) AND #4                                                                                                                                                                                                                                                                                                                                                                                                                                                                                                                                       |

### Supplemental Table S3. Embase Search Strategy

EMBASE search strategy (conducted on 3/25/2020)

| Row                          | Search concept                                                                                                                                                         | Terms                                                                                                                                                                                                                                                                                                            |
|------------------------------|------------------------------------------------------------------------------------------------------------------------------------------------------------------------|------------------------------------------------------------------------------------------------------------------------------------------------------------------------------------------------------------------------------------------------------------------------------------------------------------------|
| <b>Conditions</b>            |                                                                                                                                                                        |                                                                                                                                                                                                                                                                                                                  |
| #1                           | <b>Condition 1:</b><br>Complex<br>cryptoglandular<br>fistulas (CCF) and/or<br>cryptoglandular<br>fistulas (CF)                                                         | 'cryptoglandular fistula':ab,ti,kw OR<br><br>((cryptoglandular:ti,ab,kw OR horshoe:ab,ti,kw OR<br>branching:ab,ti,kw) AND fistul*:ti,ab,kw) OR<br><br>((mid:ab,ti,kw OR high:ab,ti,kw) AND<br>(transphincteric:ab,ti,kw OR trans-<br>sphincteric:ab,ti,kw OR transsphincteric:ab,ti,kw)<br>AND fistul*:ti,ab,kw) |
| #2                           | <b>Condition 2:</b><br>Non Perianal Crohn's<br>Fistula (NPCF):<br>Rectovaginal Fistulas<br>(RVF), Ano-vaginal<br>Fistulas (AVF),<br>Entero-cutaneous<br>Fistulas (ECF) | 'rectovaginal fistula':ti,ab,kw OR 'anovaginal<br>fistula':ti,ab,kw OR 'enterocutaneous fistula':ti,ab,kw OR<br><br>((rectovaginal:ab,ti,kw OR recto-vaginal:ab,ti,kw OR<br>anovaginal:ab,ti,kw OR ano-vaginal:ab,ti,kw OR<br>enterocutaneous:ab,ti,kw OR entero-cutaneous:ab,ti,kw)<br>AND fistul*:ab,ti,kw)    |
| #3                           | Crohn terms                                                                                                                                                            | 'crohn disease':ab,ti,kw OR crohn*:ab,ti,kw                                                                                                                                                                                                                                                                      |
| #4                           | Fistula<br>(for title filter)                                                                                                                                          | Fist*:ti                                                                                                                                                                                                                                                                                                         |
| <b>Real World Data Terms</b> |                                                                                                                                                                        |                                                                                                                                                                                                                                                                                                                  |
| #5                           | Observational studies<br>and real world data                                                                                                                           | 'cohort analysis':ab,ti,kw OR 'cross-sectional<br>study':ab,ti,kw OR 'cross sectional<br>analysis':ab,ti,kw OR 'longitudinal study':ab,ti,kw<br>OR 'prospective study':ab,ti,kw OR 'case control<br>study':ab,ti,kw OR 'electronic medical                                                                       |

|                            |                                            |                                                                                                                                                                                                                                                                                                                                                                                                                                                                                                                                                                                                                                                                                                                    |
|----------------------------|--------------------------------------------|--------------------------------------------------------------------------------------------------------------------------------------------------------------------------------------------------------------------------------------------------------------------------------------------------------------------------------------------------------------------------------------------------------------------------------------------------------------------------------------------------------------------------------------------------------------------------------------------------------------------------------------------------------------------------------------------------------------------|
|                            |                                            | <p>record':ab,ti,kw OR 'electronic health record':ab,ti,kw OR 'administrative claims':ab,ti,kw OR 'observational study':ab,ti,kw OR</p> <p>'cohort':ab,ti,kw OR cohort*:ab,ti,kw OR 'cross-sectional':ab,ti,kw OR 'longitudinal':ab,ti,kw OR 'prospective':ab,ti,kw OR 'retrospective':ab,ti,kw OR 'observational':ab,ti,kw OR 'registry':ab,ti,kw OR 'register':ab,ti,kw OR 'registries':ab,ti,kw OR 'medical record':ab,ti,kw OR 'health record':ab,ti,kw OR 'medical record':ab,ti,kw OR 'claims data':ab,ti,kw OR 'administrative claims':ab,ti,kw OR 'claims':ab,ti,kw OR 'systematic review':ab,ti,kw OR 'systematic literature review':ab,ti,kw OR 'meta-analysis':ab,ti,kw OR 'meta analysis':ab,ti,kw</p> |
| <b>Queries of Interest</b> |                                            |                                                                                                                                                                                                                                                                                                                                                                                                                                                                                                                                                                                                                                                                                                                    |
| #6                         | Measures of occurrence/association         | <p>epidemiolog*:ti,ab,kw OR pharmacoepidemiolog*:ti,ab,kw OR prevalence:ti,ab,kw OR incidence:ti,ab,kw OR rate:ti,ab,kw OR rates:ti,ab,kw OR risk:ti,ab,kw OR proportion:ti,ab,kw OR proportions:ti,ab,kw OR frequency:ti,ab,kw OR frequencies:ti,ab,kw</p>                                                                                                                                                                                                                                                                                                                                                                                                                                                        |
| #7                         | Health care resource utilization and costs | <p>'resource utilization':ti,ab,kw OR 'resource use':ti,ab,kw OR 'resource allocation':ti,ab,kw OR 'health resources':ti,ab,kw OR 'health care utilization':ti,ab,kw OR cost:ti,ab,kw OR 'cost analysis':ti,ab,kw OR economic:ti,ab,kw OR expenditures:ti,ab,kw OR 'health care cost':ti,ab,kw</p>                                                                                                                                                                                                                                                                                                                                                                                                                 |
| #8                         | Treatment Patterns                         | <p>'immunosuppressive agent':ti,ab,kw OR 'antibiotic drug':ti,ab,kw OR</p>                                                                                                                                                                                                                                                                                                                                                                                                                                                                                                                                                                                                                                         |

|  |  |                                                                                                                                                                                                                                                                                                                                                                                                                                                                                                                                                                                                                                                                                                                                                                                                                                                                                                                                                                                                                                                                                                                                                                                                                                                   |
|--|--|---------------------------------------------------------------------------------------------------------------------------------------------------------------------------------------------------------------------------------------------------------------------------------------------------------------------------------------------------------------------------------------------------------------------------------------------------------------------------------------------------------------------------------------------------------------------------------------------------------------------------------------------------------------------------------------------------------------------------------------------------------------------------------------------------------------------------------------------------------------------------------------------------------------------------------------------------------------------------------------------------------------------------------------------------------------------------------------------------------------------------------------------------------------------------------------------------------------------------------------------------|
|  |  | <p>corticosteroid:ti,ab,kw OR prednisone:ti,ab,kw OR methotrexate:ti,ab,kw OR ‘anti tnf’:ti,ab,kw OR ‘tumor necrosis factor inhibitor’:ti,ab,kw OR infliximab:ti,ab,kw OR adalimumab:ti,ab,kw OR ‘certolizumab pegol’:ti,ab,kw OR ‘certolizumab’:ti,ab,kw OR ‘monoclonal antibody’:ti,ab,kw OR natalizumab:ti,ab,kw OR vedolizumab:ti,ab,kw OR ‘interleukin antagonist’ OR ‘interleukin inhibitor’:ti,ab,kw OR ustekinumab:ti,ab,kw OR</p> <p>surgery:ti,ab,kw OR surgical:ti,ab,kw OR fistulotomy:ti,ab,kw OR sphincterotomy:ti,ab,kw OR sphincteroplasty:ti,ab,kw OR proctectomy:ti,ab,kw OR ligation:ti,ab,kw OR ‘ligation of the intersphincteric fistula tract’:ti,ab,kw OR lift:ti,ab,kw OR seton:ti,ab,kw OR ‘seton placement’:ti,ab,kw OR flap:ti,ab,kw OR ‘advancement flap’:ti,ab,kw OR ablation:ti,ab,kw OR ‘fibrin glue’:ti,ab,kw OR ‘bioprosthetic plug’:ti,ab,kw OR patterns:ti,ab,kw OR ‘treatment pattern’:ti,ab,kw OR ‘treatment patterns’:ti,ab,kw OR therapy:ti,ab,kw OR therapeutic:ti,ab,kw OR ‘cutting seton’:ti,ab,kw OR ‘fibrosing seton’:ti,ab,kw OR ‘drainage seton’:ti,ab,kw OR ‘sphincteric reconstruction’:ti,ab,kw OR ‘anal fistula plug’:ti,ab,kw OR sealant:ti,ab,kw OR ‘surgical reconstruction’:ti,ab,kw OR</p> |
|--|--|---------------------------------------------------------------------------------------------------------------------------------------------------------------------------------------------------------------------------------------------------------------------------------------------------------------------------------------------------------------------------------------------------------------------------------------------------------------------------------------------------------------------------------------------------------------------------------------------------------------------------------------------------------------------------------------------------------------------------------------------------------------------------------------------------------------------------------------------------------------------------------------------------------------------------------------------------------------------------------------------------------------------------------------------------------------------------------------------------------------------------------------------------------------------------------------------------------------------------------------------------|

|     |                           |                                                                                                                                                                                                                                                                                                                                                                                                                                                                                                                                                                                                                                                          |
|-----|---------------------------|----------------------------------------------------------------------------------------------------------------------------------------------------------------------------------------------------------------------------------------------------------------------------------------------------------------------------------------------------------------------------------------------------------------------------------------------------------------------------------------------------------------------------------------------------------------------------------------------------------------------------------------------------------|
|     |                           | ostomy:ti,ab,kw OR ostomies:ti,ab,kw OR enterostomy:ti,ab,kw OR enterostomies:ti,ab,kw OR cecostomy:ti,ab,kw OR cecostomies:ti,ab,kw OR colostomy:ti,ab,kw OR colostomies:ti,ab,kw OR duodenostomy:ti,ab,kw OR duodenostomies:ti,ab,kw OR ileostomy:ti,ab,kw OR ileostomies:ti,ab,kw OR jejunostomy:ti,ab,kw OR jejunostomies:ti,ab,kw                                                                                                                                                                                                                                                                                                                   |
| #9  | Clinical outcomes         | 'clinical outcome':ti,ab,kw OR 'clinical response':ti,ab,kw OR remission:ti,ab,kw OR recurrence:ti,ab,kw OR closure:ti,ab,kw OR 'incontinence':ti,ab,kw OR 'healing rate':ti,ab,kw OR 'success rate':ti,ab,kw OR 'response rate':ti,ab,kw OR 'recurrence rate':ti,ab,kw OR 'recurrence risk':ti,ab,kw OR 'remission rate':ti,ab,kw OR 'remission risk':ti,ab,kw OR 'incontinence rate':ti,ab,kw OR 'incontinence risk':ti,ab,kw                                                                                                                                                                                                                          |
| #10 | Patient-reported outcomes | 'patient-reported outcome':ti,ab,kw OR 'crohns disease patient-reported outcomes signs':ti,ab,kw OR 'cd pro':ti,ab,kw OR 'crohn disease activity index':ti,ab,kw OR cdai:ti,ab,kw OR 'ibd questionnaire':ti,ab,kw OR ibdq:ti,ab,kw OR 'inflammatory bowel disease questionnaire':ti,ab,kw OR 'patient reported outcome measure':ti,ab,kw OR proms:ti,ab,kw OR 'perianal disease activity index':ti,ab,kw OR PDAI:ti,ab,kw OR discharge:ti,ab,kw OR soiling:ti,ab,kw OR soil:ti,ab,kw OR soiled:ti,ab,kw OR pads:ti,ab,kw OR 'fecal incontinence':ti,ab,kw OR 'faecal incontinence':ti,ab,kw OR 'bowel incontinence':ti,ab,kw OR 'fecal soiling':ti,ab,kw |

|                             |                                                      |                                                                                                                                                                                                                                                                                                                                                                                                                                         |
|-----------------------------|------------------------------------------------------|-----------------------------------------------------------------------------------------------------------------------------------------------------------------------------------------------------------------------------------------------------------------------------------------------------------------------------------------------------------------------------------------------------------------------------------------|
|                             |                                                      | OR 'faecal soiling':ti,ab,kw OR 'EQ-5D':ti,ab,kw<br>OR 'EuroQol':ti,ab,kw OR 'EuroQol-5D':ti,ab,kw<br>OR intercourse:ti,ab,kw OR 'sexual<br>behavior':ti,ab,kw OR 'sexual activity':ti,ab,kw OR<br>'Wexner Scale of incontinence':ti,ab,kw OR<br>'Revised fecal incontinence scale':ti,ab,kw OR<br>'Revised faecal incontinence scale':ti,ab,kw OR<br>'RFIS':ti,ab,kw OR 'anal pain':ti,ab,kw OR<br>pain:ti,ab,kw OR 'leakage':ti,ab,kw |
| <b>Combination Searches</b> |                                                      |                                                                                                                                                                                                                                                                                                                                                                                                                                         |
| #11                         | Condition 2 + Crohn's                                | #2 AND #3                                                                                                                                                                                                                                                                                                                                                                                                                               |
| #12                         | Combined Queries                                     | #6 OR #7 OR #8 OR #9 OR #10                                                                                                                                                                                                                                                                                                                                                                                                             |
| <b>SEARCH RESULTS</b>       |                                                      |                                                                                                                                                                                                                                                                                                                                                                                                                                         |
| #13                         | Condition 2 +<br>Combined Queries +<br>RWD + filters | #11 AND #12 AND #5 +English, human, 10 years<br>filters                                                                                                                                                                                                                                                                                                                                                                                 |
| #14                         | Condition 1 +<br>Combined Queries +<br>RWD + filters | #1 AND #12 AND #5 +English, human, 10 years<br>filters                                                                                                                                                                                                                                                                                                                                                                                  |
| #15                         | Final search including<br>fistula title search       | (#13 OR #14) AND #4                                                                                                                                                                                                                                                                                                                                                                                                                     |
